# Supplementary material for: Comparative Transcriptome Analysis Unveils the Molecular Mechanism Underlying Sepal Colour Changes under Acidic pH Substratum in Hydrangea macrophylla
Source: MDPI journal article supplement (doi:10.3390/ijms232315428), 2022-12-06
Supplement: s1 [file s1]

## GO distribution

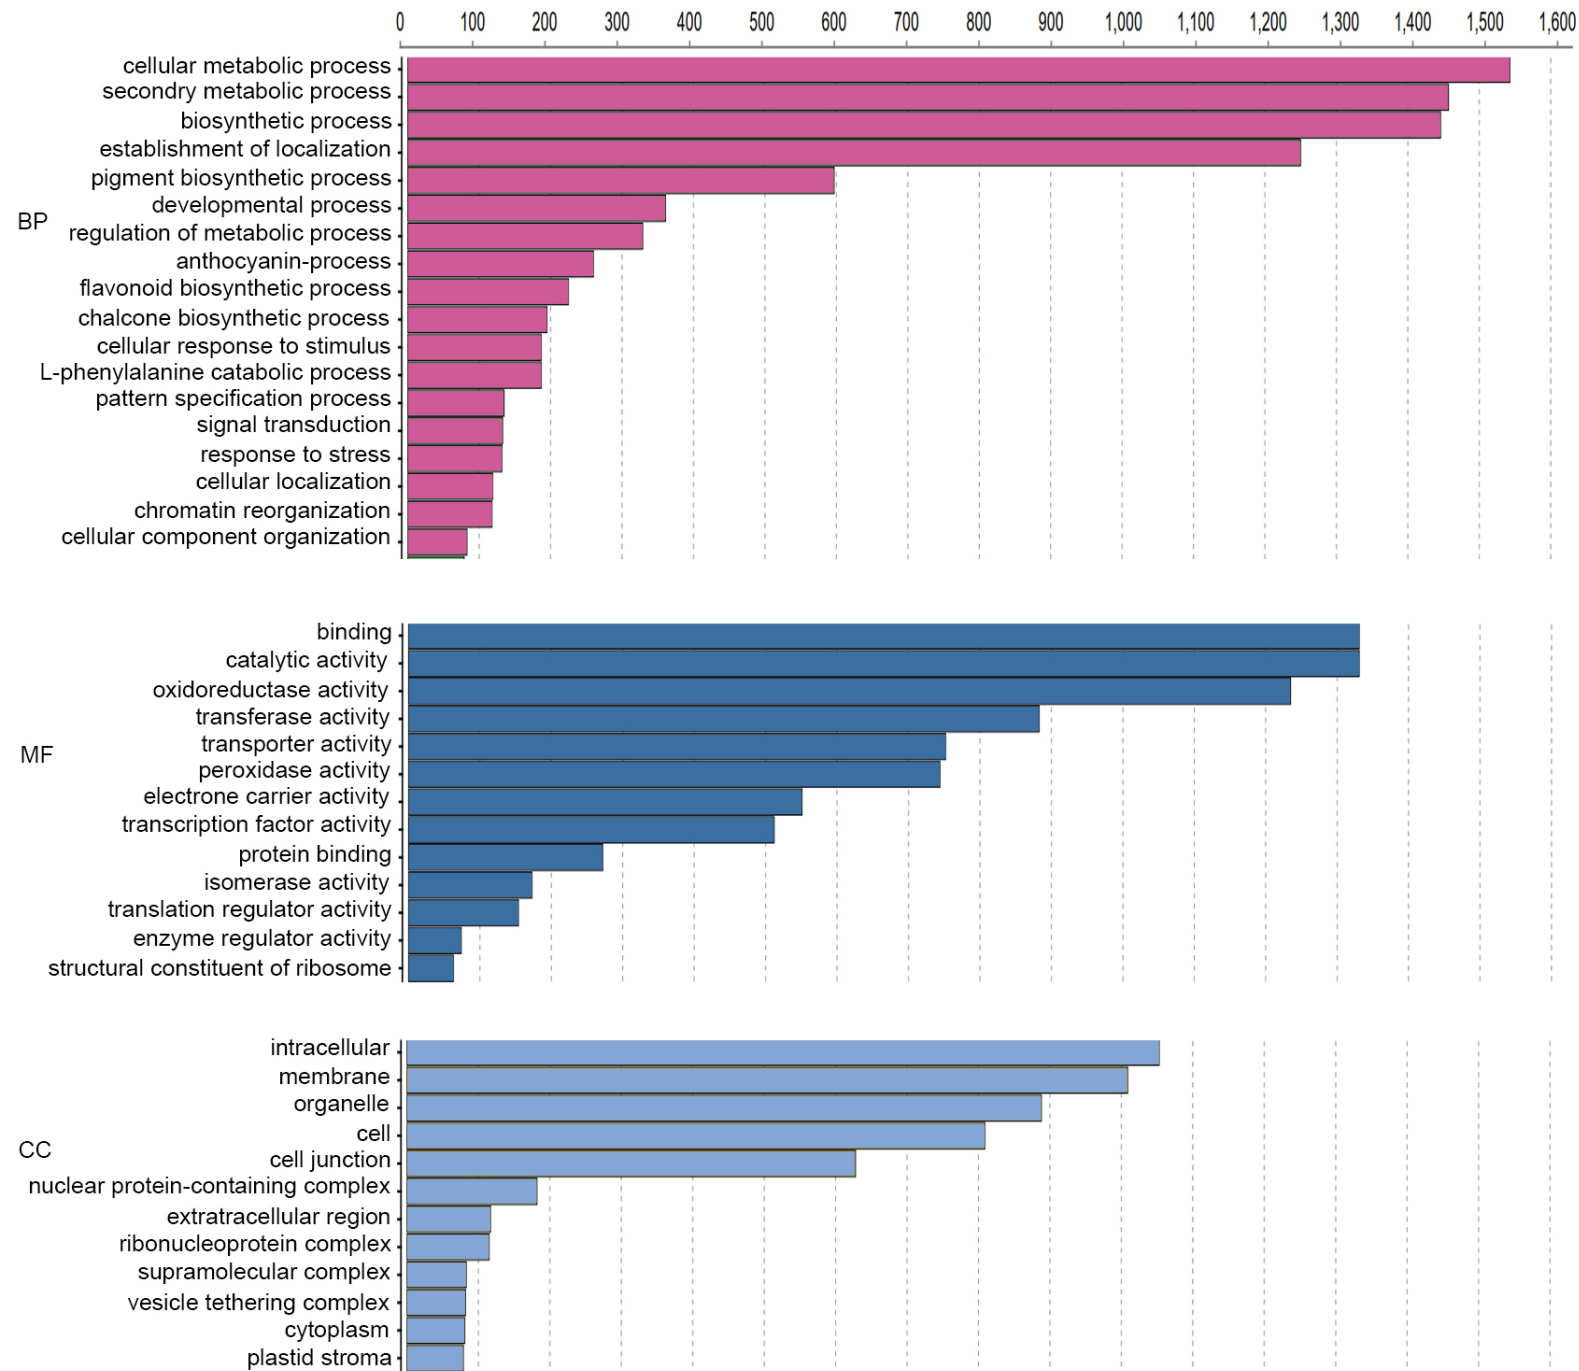

Figure S1: Functions classification of the annotated unigenes. Results are grouped by three main functional categories, Biological process, Cellular component, and Molecular function

**Table S1: Primers used for RT-PCR analysis**

| 1                | Gene   | F Primer sequence          | R Primer sequence         | Amplicon length in bp | Anneling temperture |
|------------------|--------|----------------------------|---------------------------|-----------------------|---------------------|
| 2                | CHS1   | CGCTGAAGTTGAAAGGGGATAA     | TCGAAAGTGATACCAGGGCCGA    | 136                   | 69.90               |
| 3                | CHS2   | TGCGACACTCTTCAGCTACAGAC    | ACACTATGTAGGACCACGGTCTC   | 128                   | 68.80               |
| 4                | CHS3   | ACCACGGGTGAAGGTTTGGACTG    | CATCAGTTATGGAGCAATACGCA   | 114                   | 58.00               |
| 5                | CHI1   | AAGGTGGAGAATGGGAAAGTTG     | AATCGGACGAAAGCATTGACA     | 128                   | 60.00               |
| 6                | CHI2   | AAGGTATCTGAAATGTGCGTCG     | TTGTGAAGCAAATAGAGGAGCC    | 137                   | 60.00               |
| 7                | F3H3   | GGGTGTTCACTTTATACGAGCGGT   | CCTCCCCACCTCTTCCCTGTATCT  | 192                   | 60.00               |
| 8                | F3H4   | ACAATGGCGGAGAAGTTACGGT     | GCATCATCAGATTCAACCAACA    | 88                    | 60.00               |
| 9                | F3'5'H | CGAAGGATTTGTGCAGGTATGAGCC  | AGTTTATTTCTTAACCCGTTCCGT  | 148                   | 55.00               |
| 10               | DFR1   | CAAACGAGGCCAAAAATGGATTAAC  | TCATTTATTACGAATTTTCGTCTCC | 112                   | 62.00               |
| 11               | DFR2   | AGGGCACACGTTTCATCTTCTTGAGT | TCCCGTGGTGACGAGTTTTTTAGAC | 100                   | 60.00               |
| 12               | UFGT   | CACGGCCTCAAACCTTCCTCA      | ACAAGTTGCTGGTGTGTGAAC     | 80                    | 65.00               |
| 13               | FLS1   | TGGTGACCAAATTGAGATCCTG     | TCTTTGACTTGTACTTTGGCGG    | 89                    | 68.00               |
| 14               | MYB12  | CATTCCAAGTGGGGTAATAGAT     | GTTTGCTAAGTCGTTGCTCAT     | 100                   | 59.00               |
| 15               | MYB2   | TCATGGCACAATCTATGTATGG     | TTATTTCCCCGCTTTCACCT      | 89                    | 60.00               |
| 16               | bHLH17 | CACCACCTTCCTACCAAAACC      | CCCCTTCCTTCTGCCATTC       | 88                    | 60.00               |
| 17               | bHLH21 | CAACCGATGGAAGATAGCAC       | CAACTGAGCATTGAGGG         | 103                   | 65.00               |
| 18               | WD40-1 | AGCAAAAGCAGCGAGTTCTGT      | AGGCGTATCGGGTTGAGGA       | 165                   | 62.00               |
| 19               | WD40-2 | CCACATCATCCGATTTTCTCC      | AACACACCTACACCACCCAC      | 106                   | 65.00               |
| Internal control |        | 18s                        | GTGACGGGTGACGGAGAATT      | 95                    | 65.00               |

**Table S2:Output statistics of RNA-Seq of Hydrangea macrophylla**

| <b>Samples</b> | <b>Total Reads</b> | <b>Average Length (bp)</b> | <b>GC Percentage</b> | <b>Q30 Percentage</b> |
|----------------|--------------------|----------------------------|----------------------|-----------------------|
| CS1-1          | 4496349            | 125                        | 56.46%               | 91.76%                |
| CS1-2          | 4391214            | 125                        | 46.92%               | 92.89%                |
| CS1-3          | 4412846            | 125                        | 46.70%               | 90.94%                |
| CS2-1          | 3894909            | 125                        | 46.83%               | 91.87%                |
| CS2-2          | 3783914            | 125                        | 47.20%               | 93.91%                |
| CS2-3          | 3845223            | 125                        | 46.90%               | 90.98%                |
| CS3-1          | 4559592            | 125                        | 56.83%               | 90.87%                |
| CS3-2          | 3564049            | 125                        | 57.20%               | 90.93%                |
| CS3-3          | 4659642            | 125                        | 56.19%               | 90.55%                |
| TS1-1          | 3300000            | 125                        | 56.78%               | 90.90%                |
| TS1-2          | 4071901            | 125                        | 57.10%               | 90.78%                |
| TS1-3          | 3171558            | 125                        | 56.66%               | 90.84%                |
| TS2-1          | 3893564            | 125                        | 55.13%               | 91.87%                |
| TS2-2          | 4600000            | 125                        | 55.11%               | 91.73%                |
| TS2-3          | 5272302            | 125                        | 55.61%               | 93.15%                |
| TS3-1          | 3496071            | 125                        | 54.73%               | 91.80%                |
| TS3-2          | 3000000            | 125                        | 54.25%               | 91.88%                |
| TS3-3          | 3904201            | 125                        | 54.71%               | 92.44%                |

**Table S3: List of TF families**

MYB TF family had the most members (25), followed by WD40 (20 TFs), SPF (14 TFs), bHLH (11 TFs), C2H2 (10 TFs), ERF (5 TFs), and NAC (3 TFs) families

| <b>TFs Family</b> | <b>Extended name/Function</b>       |
|-------------------|-------------------------------------|
| MYB0; GL1         | Glabra 1                            |
| MYB11; PFG2       | Production of flavonol glycosides 2 |
| MYB111; PFG3      | Production of flavonol glycosides 3 |
| MYB113            | Transcription factor MYB113         |
| MYB12; PFG1       | Production of flavonol glycosides 1 |
| MYB2              | Transcription factor MYB2           |
| MYB23             | Transcription factor MYB23          |
| MYB27             | Transcription factor MYB27          |
| MYB4              | Transcription repressor myb4        |
| MYB5              | Transcription repressor MYB5        |
| MYB66; WER        | Transcription factor MYB66          |
| MYB7; ATY49       | Transcription factor MYB7           |
| MYB82             | Transcription factor MYB82          |
| MYBL1             | MYB-like 1                          |
| MYBL2             | MYB-like 2                          |
| MYBx              | R3-MYB anthocyanin repressor        |
| MYB75             | Production of anthocyanin pigment 1 |
| MYB123            | Transparent testa 2                 |
| MYB90             | Production of anthocyanin pigment 2 |
| MYB114            | Production of anthocyanin pigment 4 |
| MYB32             | flavone biosynthesis                |
| MYB1              | Production of anthocyanin           |
| MYB6              | Production of anthocyanin           |
| MYBp3             | flavone biosynthesis                |
| R2R3-MYB          | MYB16; MIXTA                        |
| bHLH1             | bHLH1; GL3;MYC6                     |
| bHLH12            | Basic helix loop helix 12           |
| bHLH2             | Basic helix loop helix 2            |
| Bhlh4             | Basic helix loop helix 4            |
| bHLH5             | anthocyanin content                 |
| bHLH001           | anthocyanin content                 |
| bHLH21            | anthocyanin content                 |
| bHLH17            | anthocyanin content                 |
| bHLH089           | anthocyanin content                 |
| bHLH062           | anthocyanin content                 |
| bHLH033           | anthocyanin content                 |
| WD40-1            | Transcription factor WD40-1         |
| WD40-2            | Transcription factor WD40-2         |
| WD40-3            | Transcription factor WD40-3         |
| WD40-4            | Transcription factor WD40-4         |
| WD40-5            | Transcription factor WD40-5         |
| WD40-6            | Transcription factor WD40-6         |
| WD40-7            | Transcription factor WD40-7         |
| WD40-8            | Transcription factor WD40-8         |
| WD40-9            | Transcription factor WD40-9         |
| WD40-10           | Transcription factor WD40-10        |
| WD40-11           | Transcription factor WD40-11        |
| WD40-12           | Transcription factor WD40-12        |
| WD40-13           | Transcription factor WD40-13        |

|         |                                                                                                  |
|---------|--------------------------------------------------------------------------------------------------|
| WD40-14 | Transcription factor WD40-14                                                                     |
| WD40-15 | Transcription factor WD40-15                                                                     |
| WD40-16 | Transcription factor WD40-16                                                                     |
| WD40-17 | Transcription factor WD40-17                                                                     |
| WD40-18 | Transcription factor WD40-18                                                                     |
| WD40-19 | Transcription factor WD40-19                                                                     |
| WD40-20 | Transcription factor WD40-20                                                                     |
| NAC019  | dehydration response                                                                             |
| NAC2    | regulation of transcription                                                                      |
| NAC1    | transcription factor involved in shoot apical meristem and auxin-mediated lateral root formation |
| AP2-ERF | positive regulator of the ABA response                                                           |
| AP2-ERF | Pathogenesis-related transcriptional factor                                                      |
| AP2-ERF | secondary cell wall metabolism                                                                   |
| AP2-ERF | secondary cell wall metabolism                                                                   |
| AP2-ERF | response to stress                                                                               |
| C2H2    | zinc finger protein 8 (ZFP8)                                                                     |
| C2H2    | C2H2-like zinc finger protein                                                                    |
| C2H2    | zinc finger protein9 (ZFP8)                                                                      |
| C2H2    | regulation of transcription                                                                      |
| C2H2    | Calcium-dependent ARF-type GTPase activating protein family                                      |
| C2H2    | Zinc finger, C2H2-type, response to photooxidative stress.                                       |
| C2H2    | Zinc finger, C2H2-type, salt tolerance zinc finger                                               |
| C2H2    | Zinc finger, C2H2-type                                                                           |
| C2H2    | Zinc finger, C2H2-type                                                                           |
| C2H2    | Zinc finger, C2H2-type                                                                           |
| zf-HD33 | regulation of transcription                                                                      |
| zf-HD34 | growth stages                                                                                    |
| zf-HD3  | plant structures                                                                                 |
| zf-HD31 | regulation of transcription                                                                      |
| zf-HD21 | regulation of transcription                                                                      |
| zf-HD9  | meta ion binding                                                                                 |
| zf-HD21 | regulation of transcription                                                                      |
| zf-HD22 | regulation of transcription                                                                      |
| zf-HD23 | regulation of transcription                                                                      |
| zf-HD24 | regulation of transcription                                                                      |
| zf-HD25 | regulation of transcription                                                                      |
| zf-HD26 | regulation of transcription                                                                      |
| zf-HD27 | regulation of transcription                                                                      |
| zf-HD1  | regulation of transcription                                                                      |

**Table S4: Enriched module information in TS2.**

| <b>Module</b> | <b>Terms ID</b> | <b>Enriched pathways related to color formation</b> | <b>List hit</b> | <b>P-value</b> |
|---------------|-----------------|-----------------------------------------------------|-----------------|----------------|
| light green   | ko00941         | flavonoid biosynthesis                              | 10              | 0.000657       |
|               | ko00940         | phenylpropanoid biosynthesis                        | 30              | 0.000012       |
|               | GO:0009813      | flavonoid biosynthetic process                      | 10              | 0              |
|               | ko00942         | anthocyanin biosynthesis                            | 19              | 0.000531       |
|               | GO:0009715      | chalcone biosynthetic process                       | 6               | 0.000008       |
| brown         | ko00942         | anthocyanin biosynthesis                            | 9               | 0.000001       |
|               | ko00943         | flavonoid metabolism                                | 2               | 0.000077       |
|               | ko00940         | phenylpropanoid biosynthesis                        | 7               | 0.000043       |
|               | GO:0045552      | dihydrokaempferol 4-reductase biosynthesis          | 3               | 0.000088       |
|               | GO:0006559      | L-phenylalanine catabolic process                   | 4               | 0.000051       |

The enriched pathways related to flower color formation of each module are summarized.

**Table S5: Co-expression of putative genes relatef to flavonoid biosynthesis** \* Significant at  $p < 0.05$ ; \*\* Significant at  $p < 0.01$

| Gene name | #ID                  | Cluster-33435.149150 | Cluster-33435.149151 | Cluster-33435.158754 | C2H2   | C3H    | DFR     | F3'5'H  | CYP73A | F3H    | ANS     |
|-----------|----------------------|----------------------|----------------------|----------------------|--------|--------|---------|---------|--------|--------|---------|
| MYB2      | Cluster-33435.66205  | 0.43                 | 0.825*               | 0.913**              | 0.053  | 0.745* | 0.853** | 0.653** | -0.358 | -0.183 | 0.652** |
| WDR40     | Cluster-33435.149151 | 0.707                | 0.705**              | 0.833**              | -0.072 | -0.076 | -0.81   | -0.413  | -0.525 | -0.165 | -0.326  |
| WDR40     | Cluster-33435.149150 | 0.254                | 0.245*               | 0.459**              | 0.289  | -0.517 | -0.725  | -0.125  | -0.315 | -0.419 | -0.426  |
| WDR68     | Cluster-33435.149154 | 0.462                | 0.775*               | 0.624**              | -0.184 | -0.806 | -0.546  | -0.541  | -0.411 | -0.547 | -0.367  |
